# Supplementary material for: Highly efficient solar cells based on Cl incorporated tri-cation perovskite materials
Source: Royal Society of Chemistry journal article supplement (doi:10.1039/c8ta03953d), 2018-01-01
Supplement: c8ta03953d1.pdf [file c8ta03953d1.pdf]

## Supporting Information

# Highly efficient solar cells based on Cl incorporated tri-cation perovskite materials

*Muhammad Azam<sup>#,€</sup>, Shizhong Yue<sup>#,€</sup>, Rui Xu<sup>‡</sup>, Kong Liu<sup>€</sup>, Kuankuan Ren<sup>€</sup>, Yang Sun<sup>€</sup>, Jun Liu<sup>€</sup>,  
Zhijie Wang<sup>\*,€</sup>, Shengchun Qu<sup>\*,€</sup>, Yong lei<sup>\*,‡</sup>, and Zhanguo Wang<sup>€</sup>*

<sup>€</sup>Key Laboratory of Semiconductor Materials Science, Beijing Key Laboratory of Low Dimensional  
Semiconductor Materials and Devices, Institute of Semiconductors, Chinese Academy of Sciences,  
Beijing, 100083, People's Republic of China; College of Materials Science and Opto-Electronic  
Technology, University of Chinese Academy of Sciences, Beijing 100049, China.

E-mail: wangzj@semi.ac.cn, [qsc@semi.ac.cn](mailto:qsc@semi.ac.cn).

<sup>‡</sup> Institut für Physik & IMN MacroNano@ (ZIK), Technische Universität Ilmenau, 98693 Ilmenau,  
Germany.

E-mail: [yong.lei@tu-ilmenau.de](mailto:yong.lei@tu-ilmenau.de).

**Section 1** Supporting figures and tables

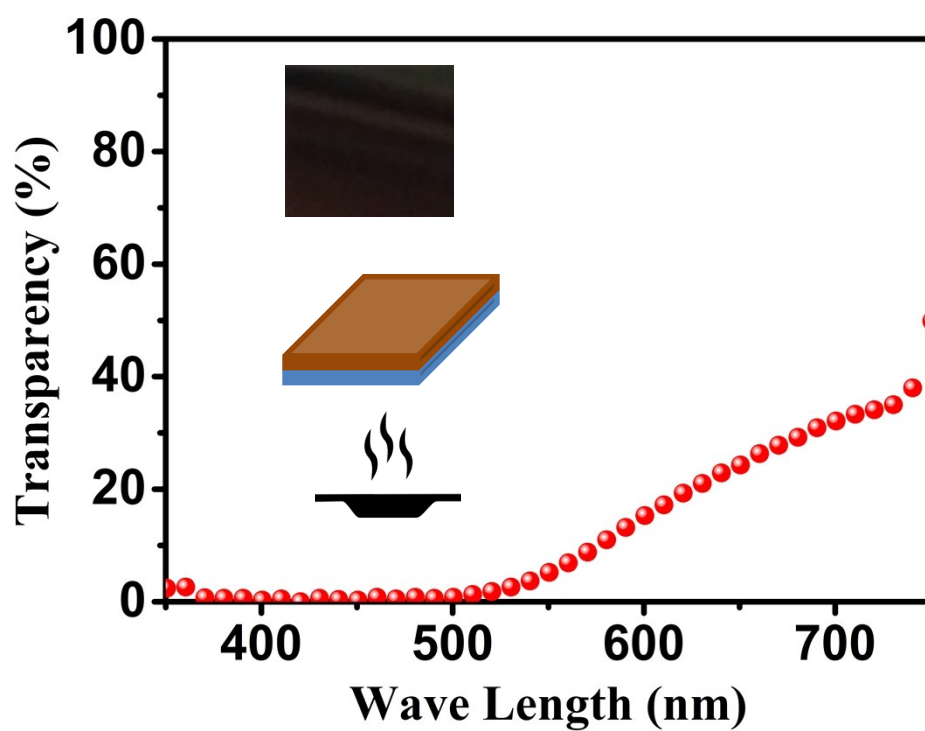

**Fig. S1** Transparency of best performing perovskite composition deposited on FTO glass substrate and annealed at 100 °C for 10 min.

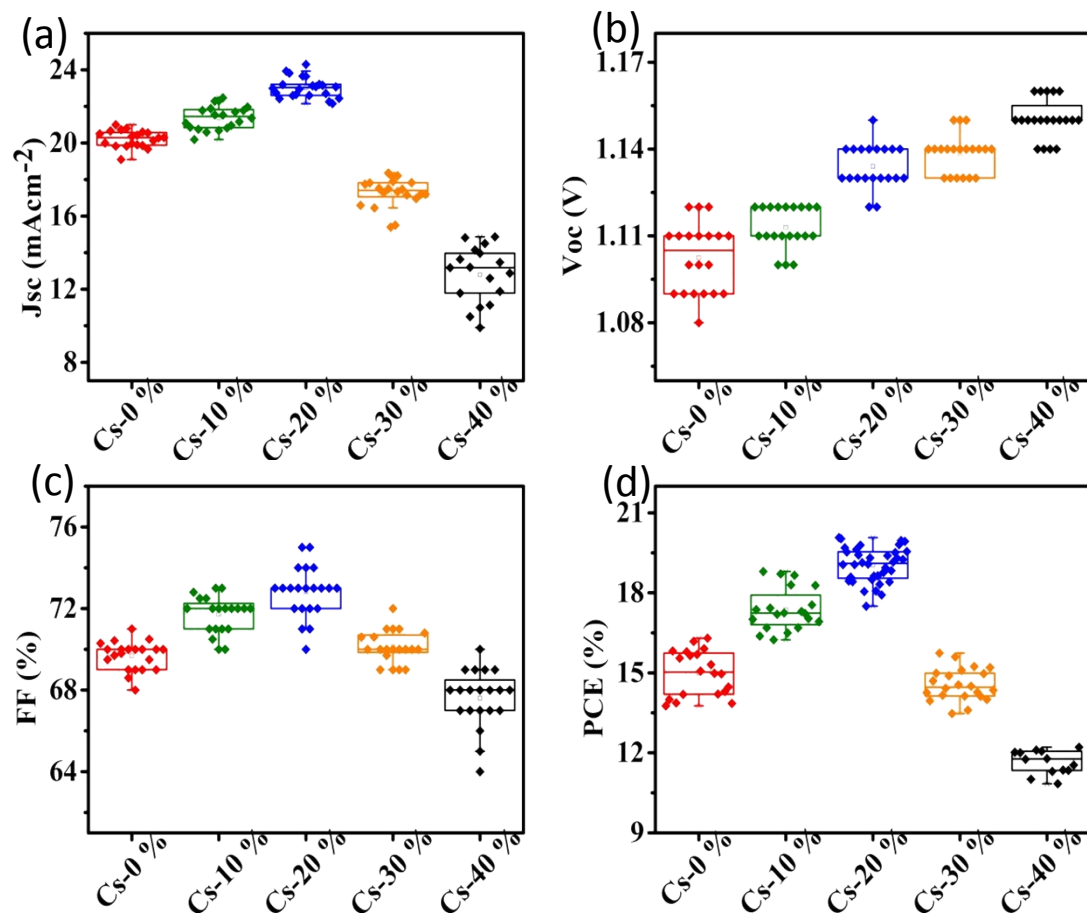

**Fig. S2** Statistical analysis of device parameters based on  $\text{Cs}_x\text{FA}_{0.2}\text{MA}_{0.8-x}\text{Pb}(\text{I}_{0.9}\text{Cl}_{0.1})_3$  ( $x = 0, 0.1, 0.2, 0.3, 0.4$ ).

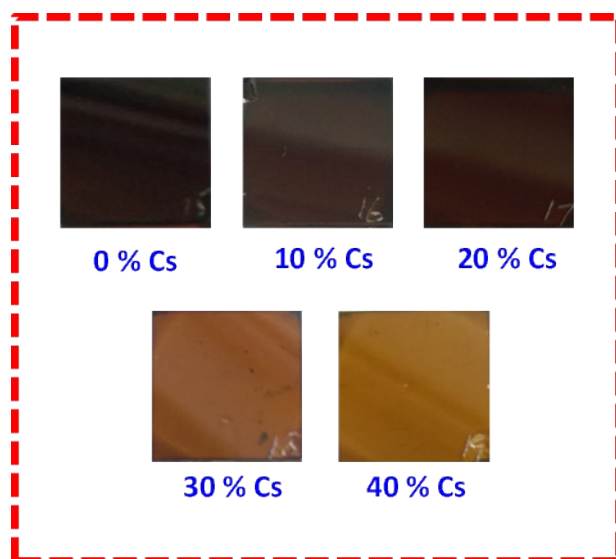

**Fig. S3** Colour changes of the perovskite films as the function of Cs ratio in  $\text{Cs}_x\text{FA}_{0.4-x}\text{MA}_{0.6}\text{Pb}(\text{I}_{0.9}\text{Cl}_{0.1})_3$  ( $x = 0, 0.1, 0.2, 0.3, 0.4$ ) after annealing at 100 °C for 10 mints.

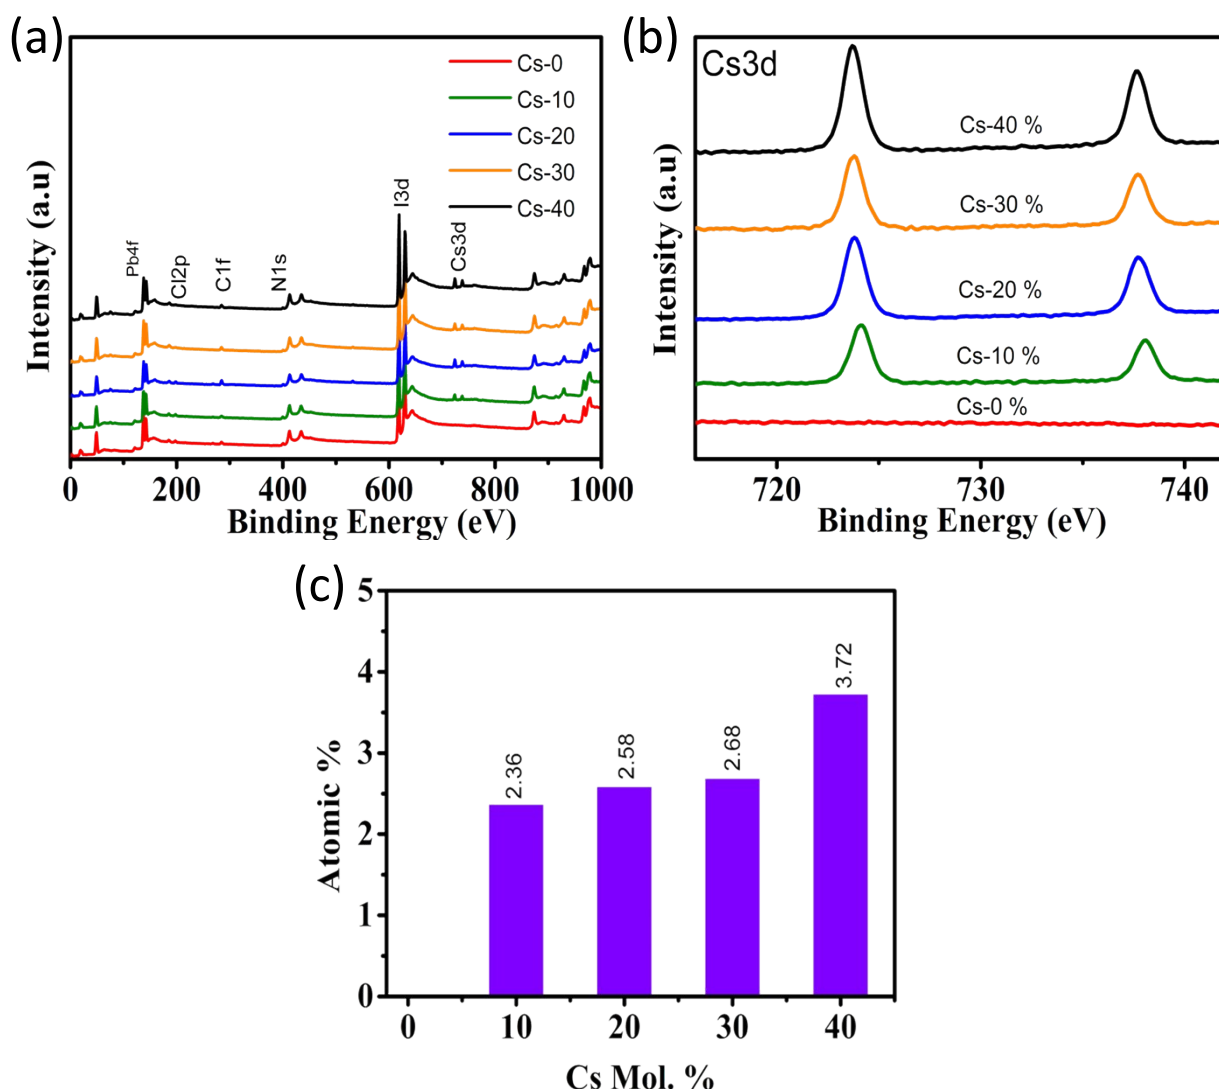

**Fig. S4** (a) The X-ray photoelectron spectrum of  $\text{Cs}_x\text{FA}_{0.2}\text{MA}_{0.8-x}\text{Pb}(\text{I}_{0.9}\text{Cl}_{0.1})_3$  (b) XPS spectrum of Cs element. (c) Cs atomic % in respective perovskite films.

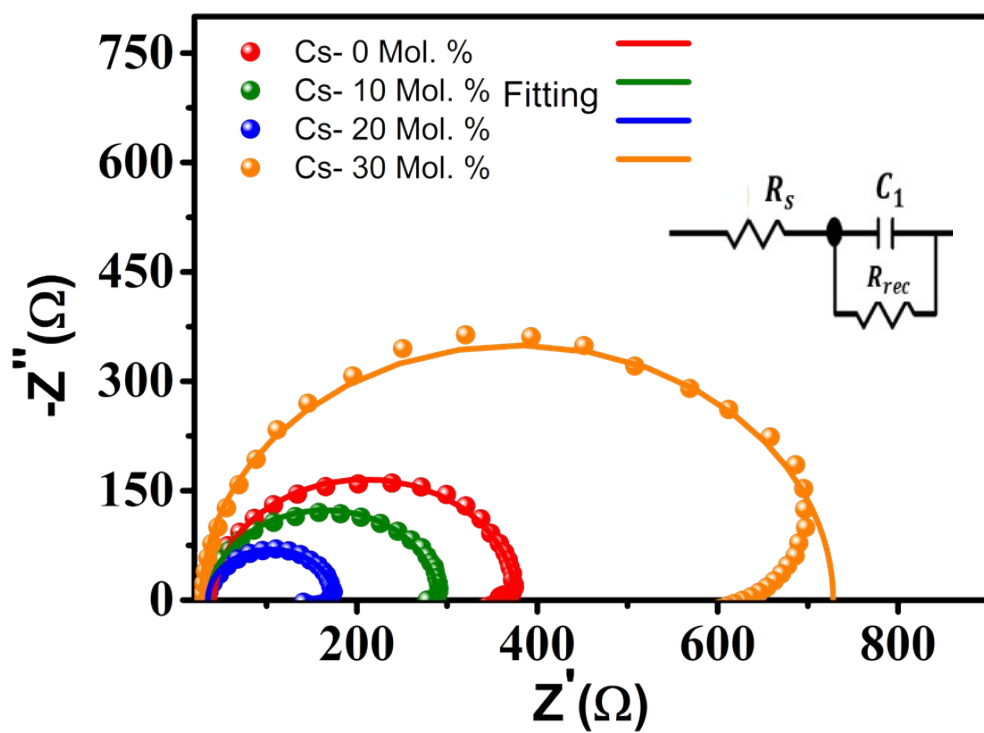

**Fig. S5** Nyquist plots of the devices (0-30 Mol.% Cs ratio) measured in dark at  $V \approx V_{oc}$ , the right inset is the equivalent circuit model.

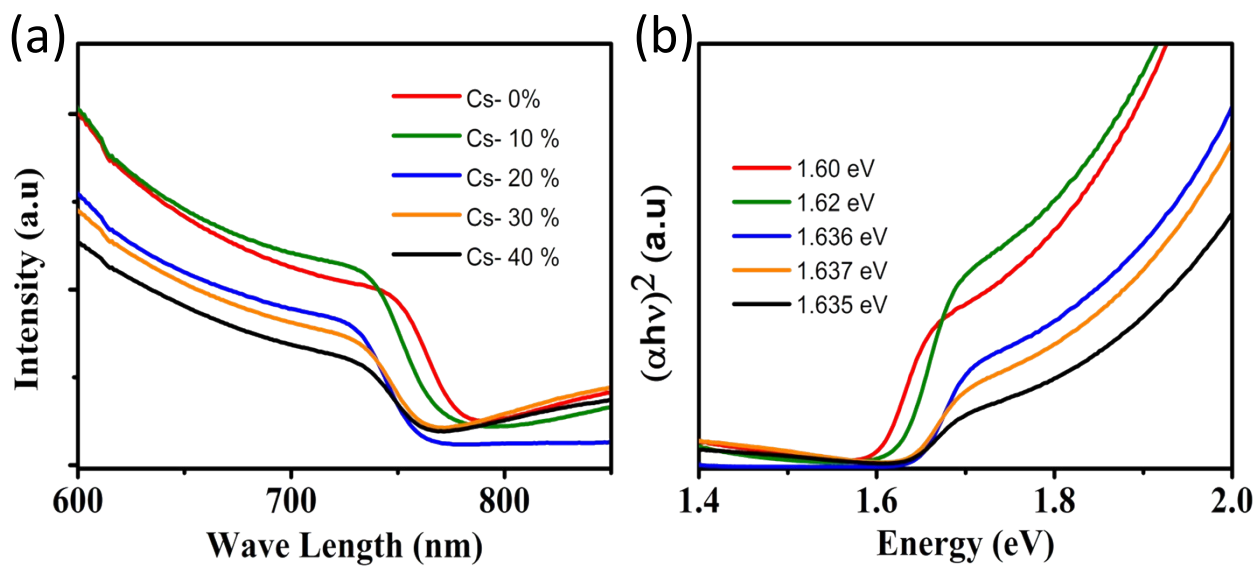

**Fig. S6** (a) Absorbance spectra of perovskite films on glass based on perovskite  $\text{Cs}_x\text{FA}_{0.2}\text{MA}_{0.8-x}\text{Pb}(\text{I}_{0.9}\text{Cl}_{0.1})_3$  ( $x = 0, 0.1, 0.2, 0.3, 0.4$ ). (b) The corresponding optical band gap energy ( $E_g$ ).

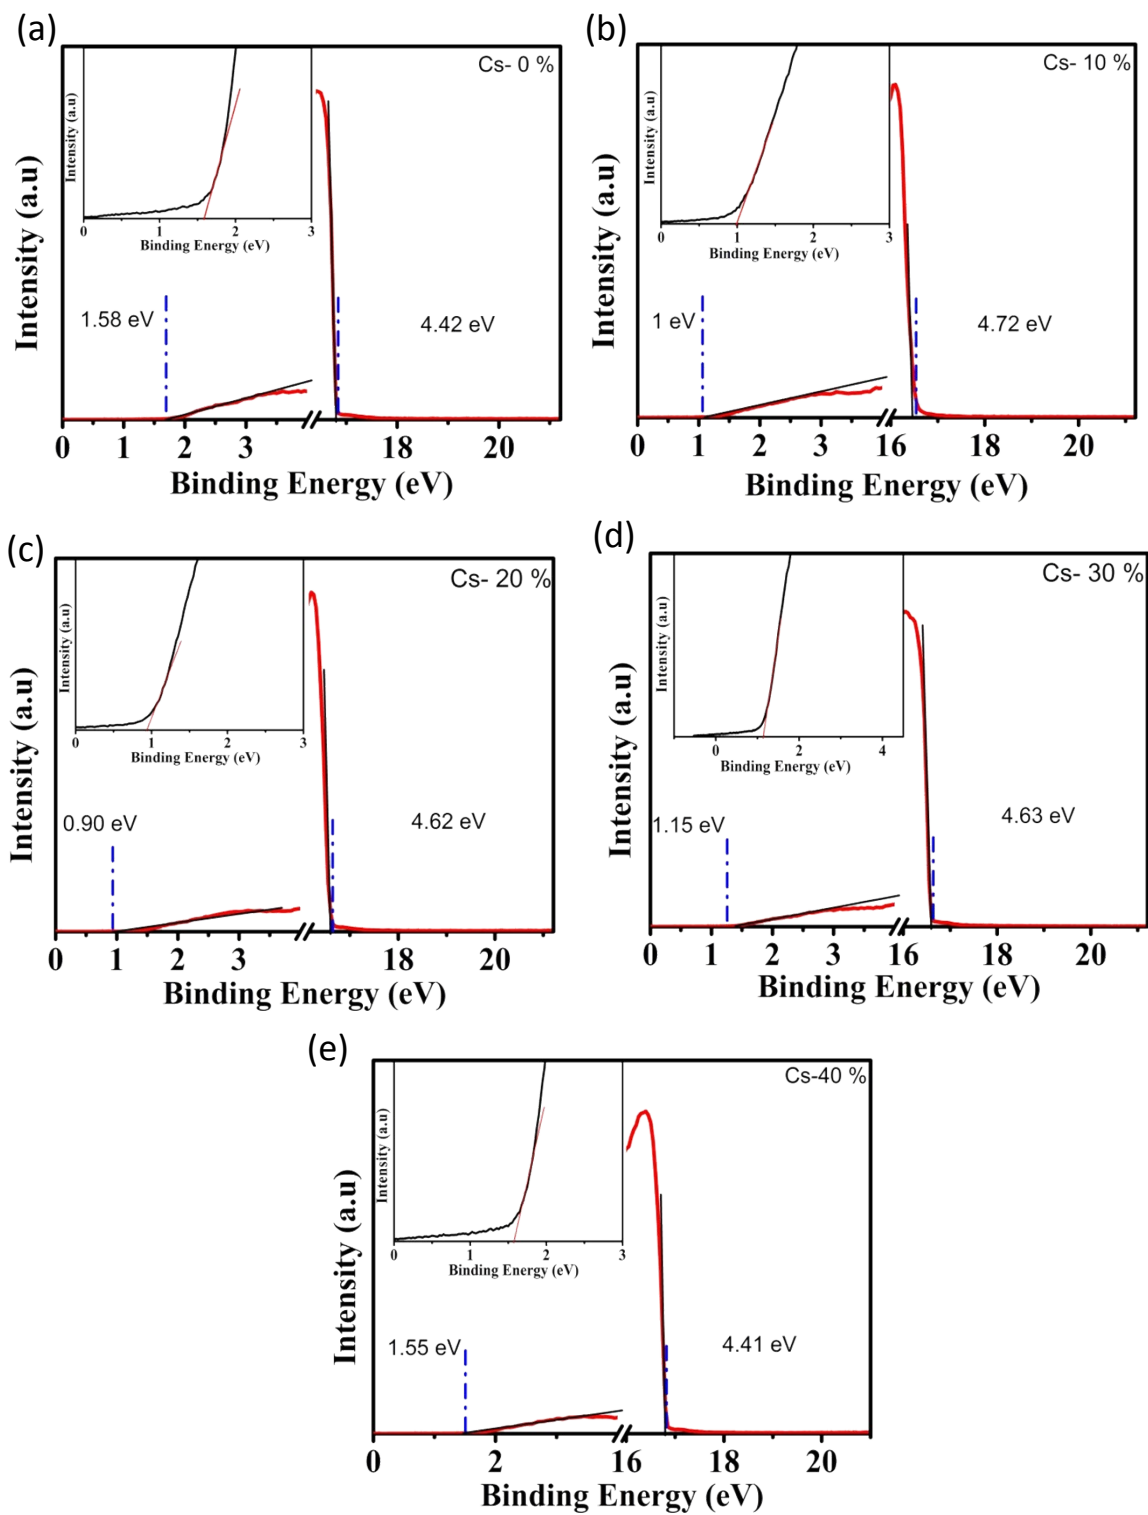

**Fig. S7** The ultraviolet photoelectron spectra of series of films, based on  $\text{Cs}_x\text{FA}_{0.2}\text{MA}_{0.8-x}\text{Pb}(\text{I}_{0.9}\text{Cl}_{0.1})_3$  the inset zooms in the low binding energy region, (a)  $x = 0$  (b)  $x = 0.1$  (c)  $x = 0.2$  (d)  $x = 0.3$  (e)  $x = 0.4$

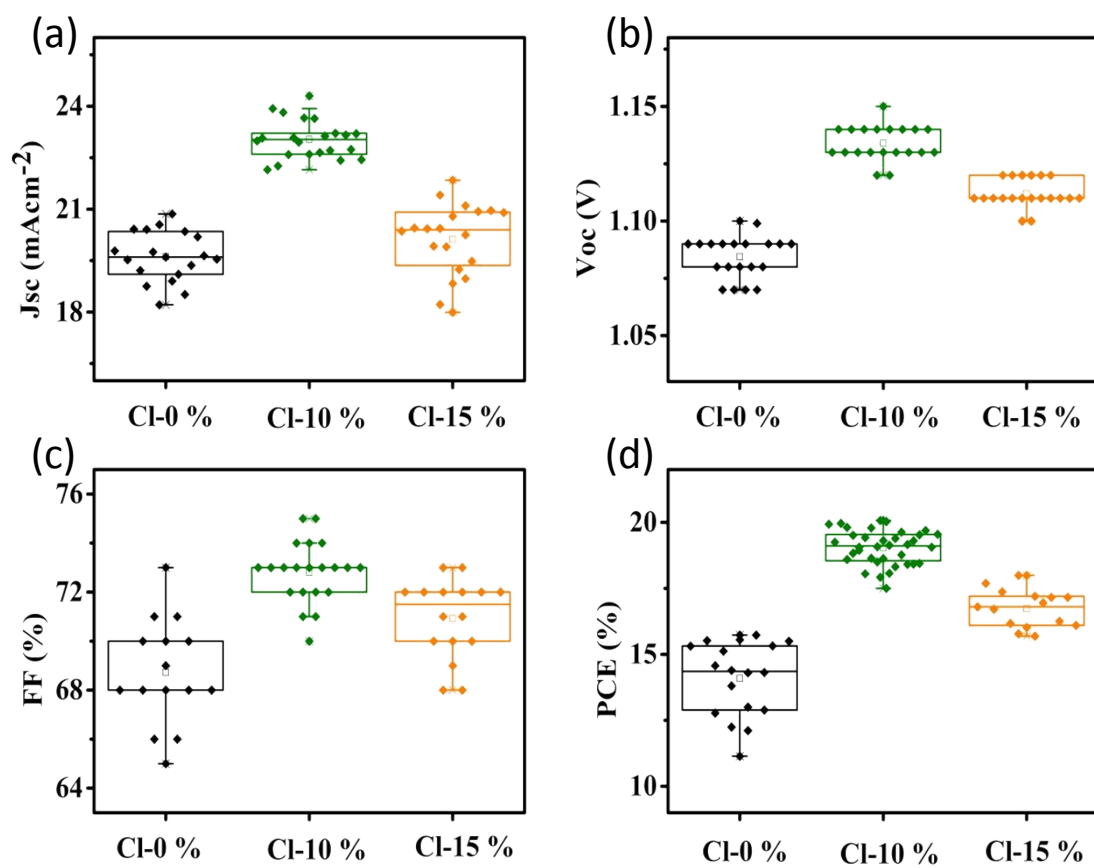

**Fig. S8** Statistical analysis of device parameters based on  $\text{Cs}_{0.2}\text{FA}_{0.2}\text{MA}_{0.6}\text{Pb}(\text{I}_{1-y}\text{Cl}_y)_3$  ( $y = 0, 0.1, 0.15$ ).

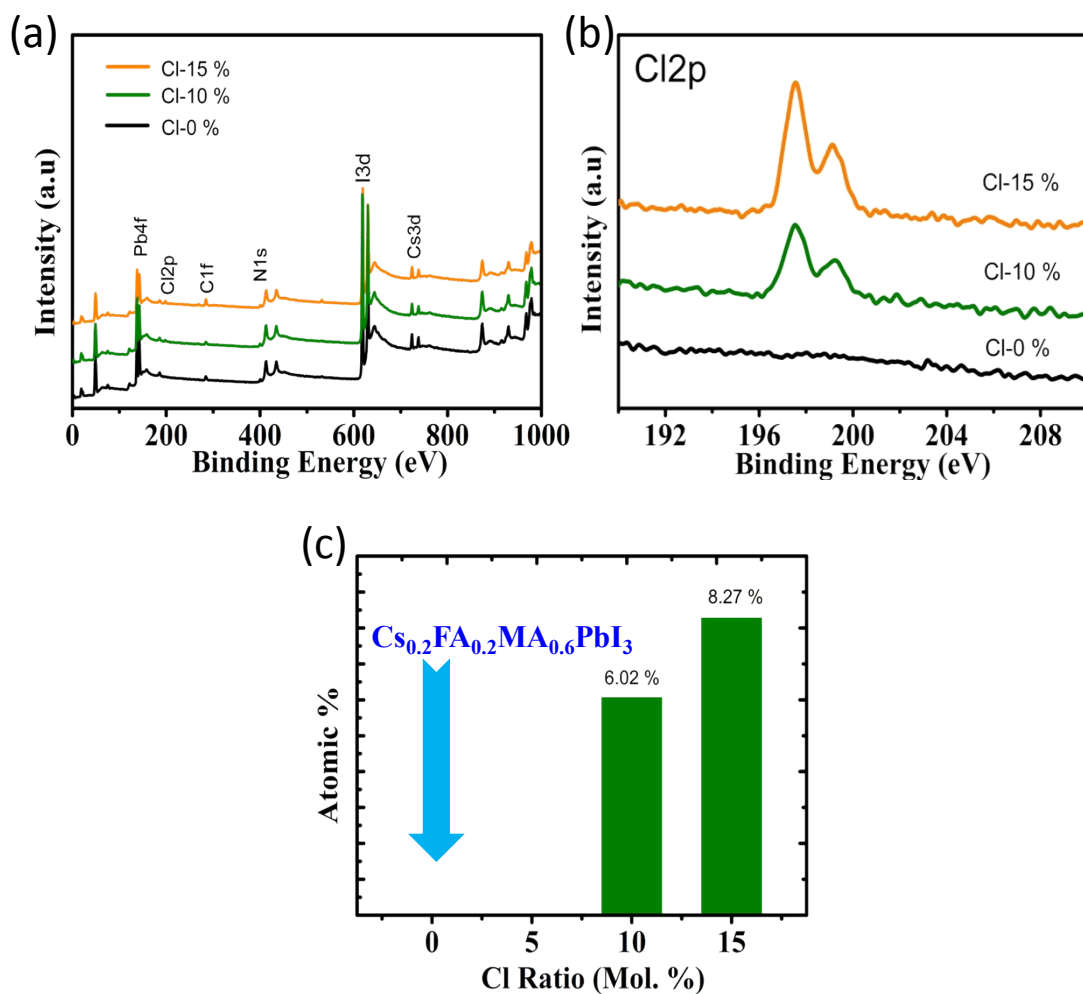

**Fig. S9** (a) The X-ray photoelectron spectrum of  $\text{Cs}_{0.2}\text{FA}_{0.2}\text{MA}_{0.6}\text{Pb}(\text{I}_{1-y}\text{Cl}_y)_3$  ( $y = 0, 0.1, 0.15$ ) (b) XPS spectrum of Cl element (c) Cl atomic % in respective perovskite films.

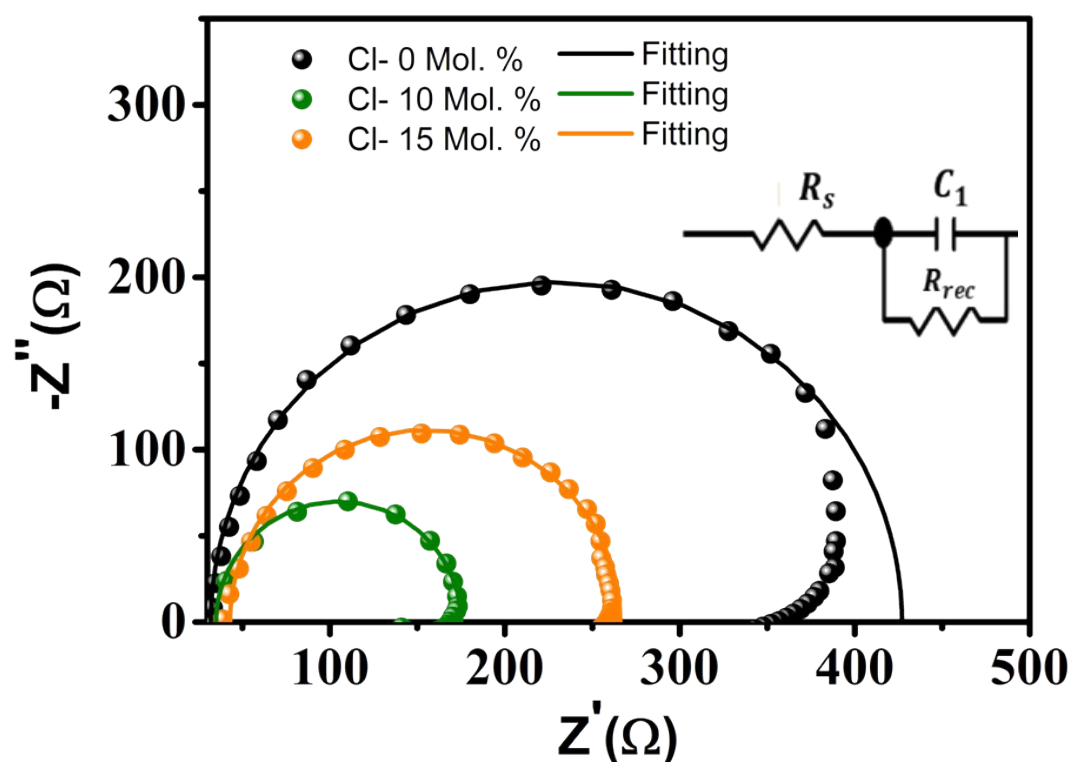

**Fig. S10** Nyquist plots of the devices (0-15 Mol.% Cl ratio) measured in dark at  $V \approx V_{oc}$ , the right inset shows the equivalent circuit.

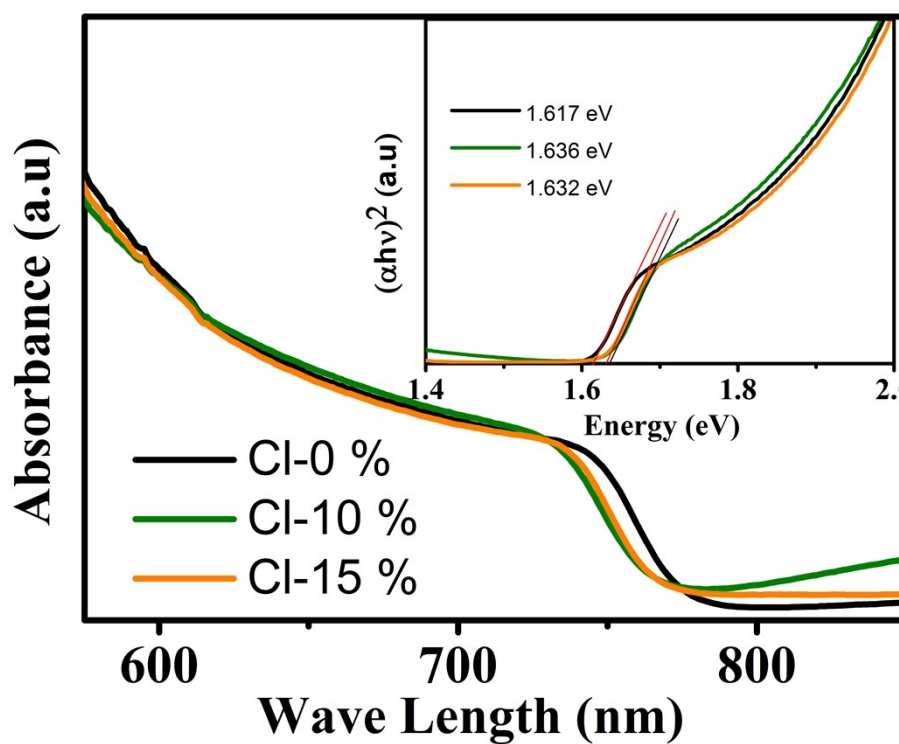

**Fig. S11** Absorbance spectra of the perovskite films based on  $\text{Cs}_{0.2}\text{FA}_{0.2}\text{MA}_{0.6}\text{Pb}(\text{I}_{1-y}\text{Cl}_y)_3$  ( $y = 0, 0.1, 0.15$ ), the inset shows the Tauc plots to calculate the band gap energy of corresponding films.

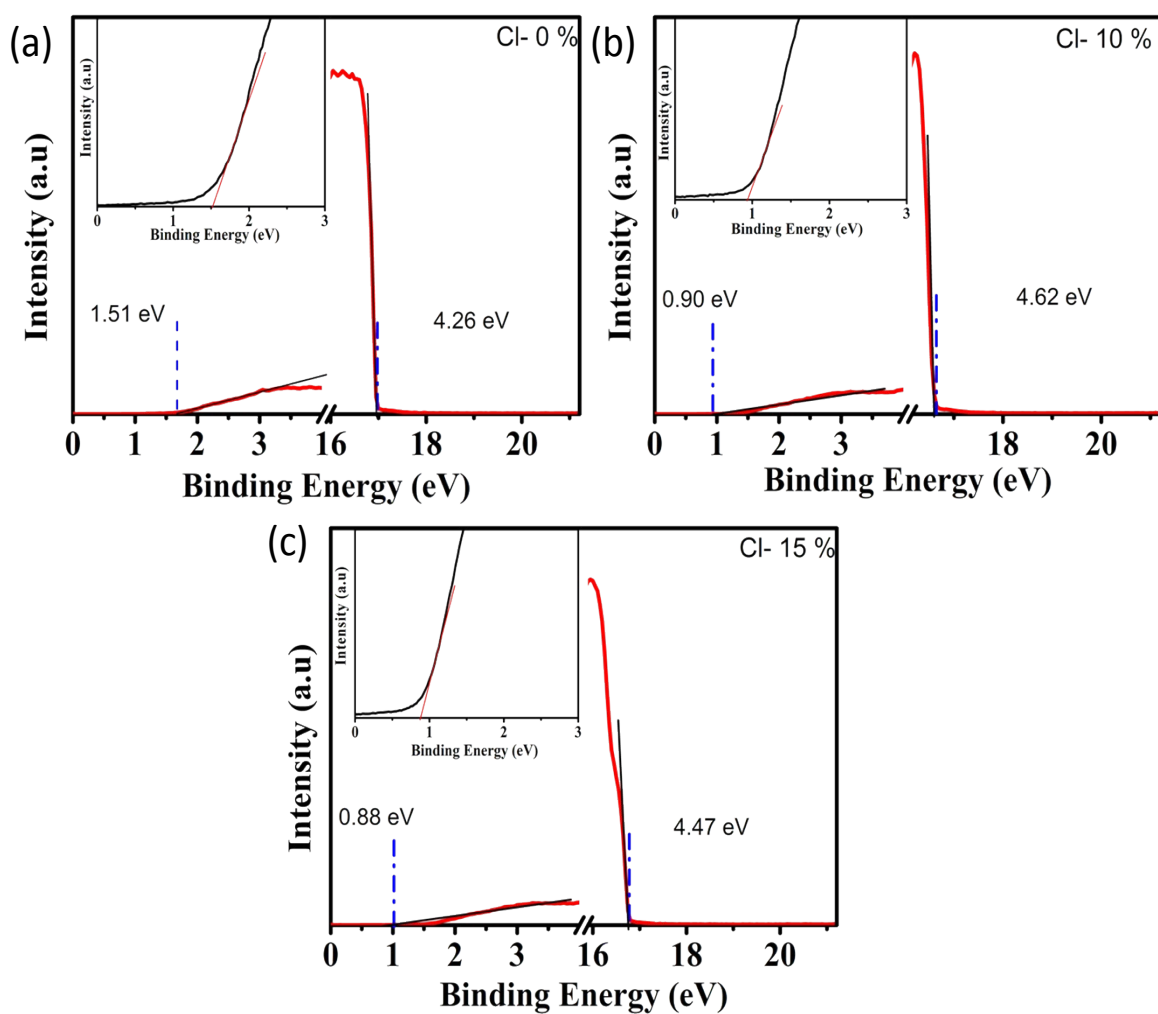

**Fig. S12** The ultraviolet photoelectron spectra of series of films, based on  $\text{Cs}_{0.2}\text{FA}_{0.2}\text{MA}_{0.6}\text{Pb}(\text{I}_{1-y}\text{Cl}_y)_3$ , the inset zooms in the low binding energy region, (a)  $y = 0$  (b)  $y = 0.1$  (c)  $y = 0.15$

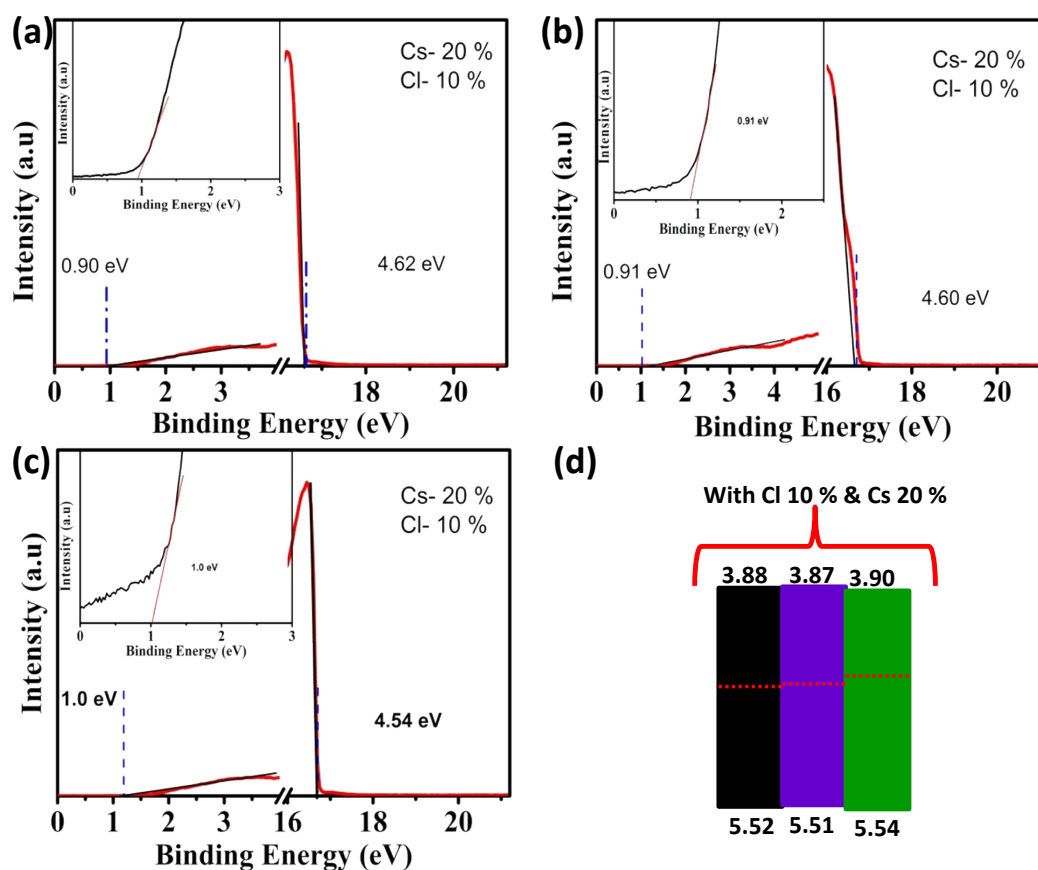

**Fig. S13** UPS spectra of the  $\text{Cs}_x\text{FA}_{0.2}\text{MA}_{0.8-x}\text{Pb}(\text{I}_{1-y}\text{Cl}_y)_3$  film with 20% Cs and 10% Cl incorporation (a-c). (d) Energy level diagram for all three perovskite (10% Cl, 20% Cs) films.

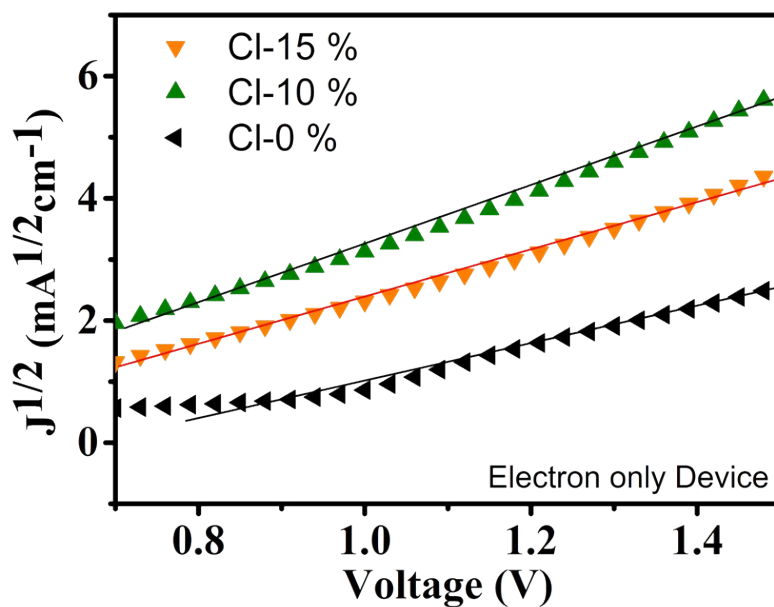

**Fig. S14**  $J^{1/2}$ - $V$  curves of the electron-only devices with the structure of ITO/Al/ $\text{Cs}_{0.2}\text{FA}_{0.2}\text{MA}_{0.6}\text{Pb}(\text{I}_{1-y}\text{Cl}_y)_3$  ( $y = 0, 0.1, 0.15$ )/PC<sub>61</sub>BM/Al.

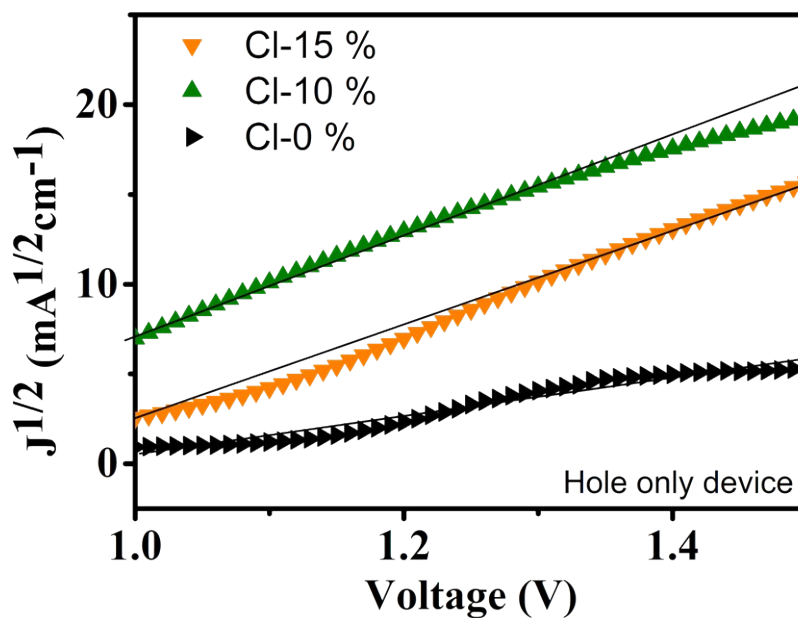

**Fig. S15**  $J^{1/2}$ - $V$  curves of the Hole-only devices with the structure of ITO/ $\text{NiO}_x$ +5%Cu/ $\text{Cs}_{0.2}\text{FA}_{0.2}\text{MA}_{0.6}\text{Pb}(\text{I}_{1-y}\text{Cl}_y)_3$  ( $y = 0, 0.1, 0.15$ )/Au.

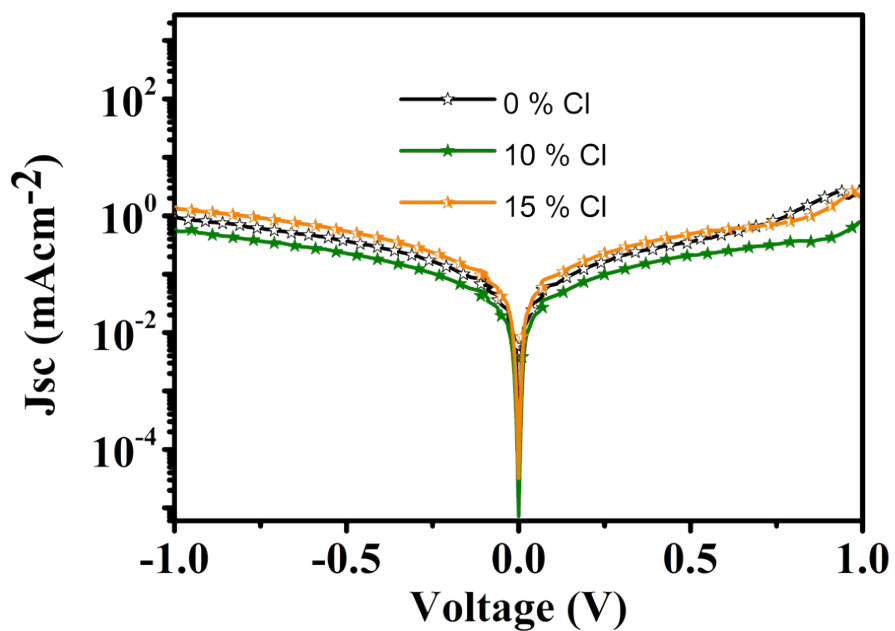

**Fig. S16** J–V curves of the devices measured under dark conditions based on  $\text{Cs}_{0.2}\text{FA}_{0.2}\text{MA}_{0.6}\text{Pb}(\text{I}_{1-y}\text{Cl}_y)_3$  ( $y = 0, 0.1, 0.15$ ) perovskite material.

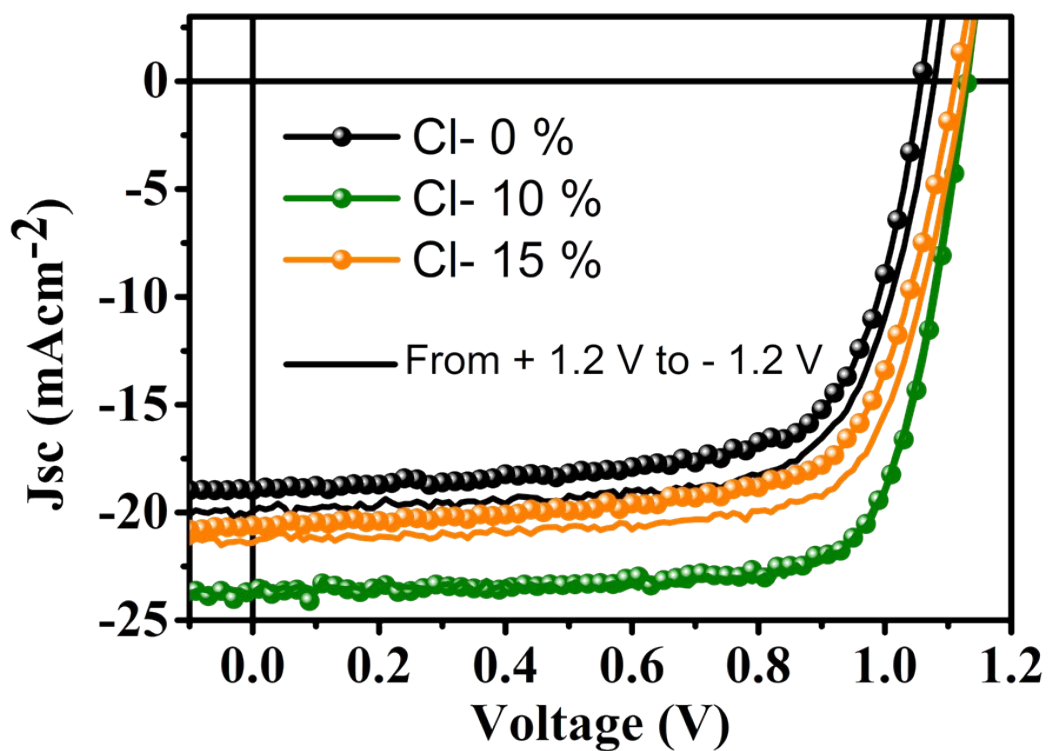

**Fig. S17** J-V characteristics of the devices fabricated by perovskite Films  $\text{Cs}_{0.2}\text{FA}_{0.2}\text{MA}_{0.6}\text{Pb}(\text{I}_{1-y}\text{Cl}_y)_3$  ( $y = 0, 0.1, 0.15$ ) measured in forward and reverse scan direction.

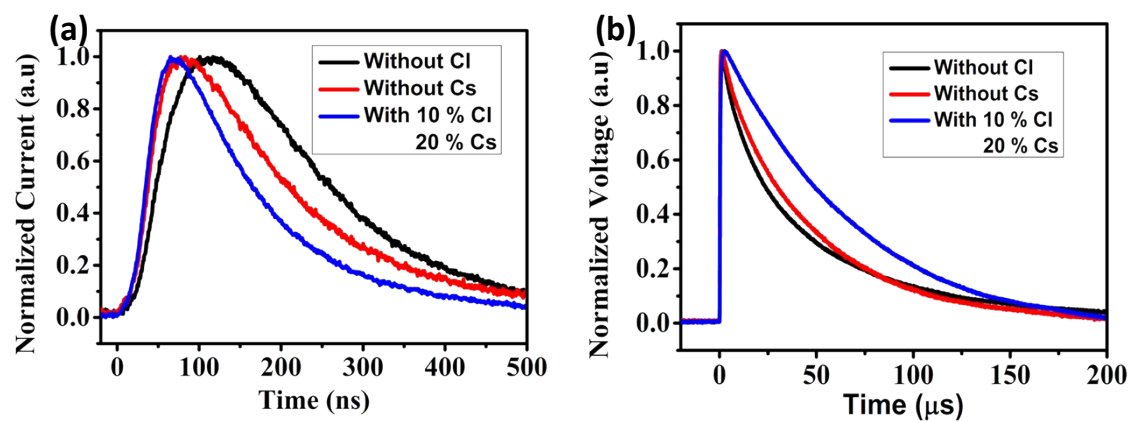

**Fig. S18** (a) Transient photocurrent decay curves with and without Cs, Cl incorporation. (b) Transient photo voltage decay curves of corresponding devices.

**Table S1** The fitting result of impedance spectra for the devices based on  $\text{Cs}_x\text{FA}_{0.2}\text{MA}_{0.8-x}\text{Pb}(\text{I}_{0.9}\text{Cl}_{0.1})_3$  ( $x = 0, 0.1, 0.2, 0.3$ ) films.

| <b>Cs<br/>[Mol. %]</b> | <b>Rs<br/>[Ω]</b> | <b>R1<br/>[Ω]</b> | <b>R2<br/>[Ω]</b> |
|------------------------|-------------------|-------------------|-------------------|
| 0                      | 42                | 292               | 41.5              |
| 10                     | 37                | 217               | 33                |
| 20                     | 35                | 120               | 20                |
| 30                     | 28                | 600               | 100               |

**Table S2** The fitting result of impedance spectra for the devices based on  $\text{Cs}_{0.2}\text{FA}_{0.2}\text{MA}_{0.6}\text{Pb}(\text{I}_{1-y}\text{Cl}_y)_3$  ( $y = 0, 0.1, 0.15$ ) films.

| <b>Cl<br/>Mol. %</b> | <b>Rs<br/>[Ω]</b> | <b>R1<br/>[Ω]</b> | <b>R2<br/>[Ω]</b> |
|----------------------|-------------------|-------------------|-------------------|
| 0                    | 35                | 325               | 70                |
| 10                   | 35                | 120               | 20                |
| 15                   | 43                | 188               | 35                |

**Table S3** The  $V_{TFL}$  and electron trap-states of the corresponding electron-only devices.

| Electron only device       | CI-0 [M%] | CI-10 [M%] | CI-15 [M%] |
|----------------------------|-----------|------------|------------|
| $V_{TFL}$ [V]              | 0.92      | 0.43       | 0.5        |
| $n_t$ [ $10^{16}cm^{-3}$ ] | 2.17      | 1.01       | 1.18       |

**Table S4** The  $V_{TFL}$  and hole trap-states of the corresponding hole-only devices.

| Hole only device           | CI-0 | CI-10 | CI-15 |
|----------------------------|------|-------|-------|
| $V_{TFL}$ [V]              | 1.04 | 0.66  | 0.83  |
| $n_t$ [ $10^{16}cm^{-3}$ ] | 2.45 | 1.55  | 1.95  |

**Table S5** The electron mobility of the corresponding electron-only devices.

| Electron Mobility         | CI-0 | CI-10 | CI-15 |
|---------------------------|------|-------|-------|
| $10^{-4}cm^2V^{-1}s^{-1}$ | 0.66 | 1.68  | 1.04  |

**Table S6** The hole mobility of the corresponding hole-only devices.

| Hole Mobility             | CI-0 | CI-10 | CI-15 |
|---------------------------|------|-------|-------|
| $10^{-3}cm^2V^{-1}s^{-1}$ | 1.22 | 5.90  | 4.09  |

**Table S7** Corresponding device parameters measured under revers and forward scan directions.

| <b>Cl Ratio</b> | <b>Scan</b> | <b>J<sub>sc</sub></b>      | <b>V<sub>oc</sub></b> | <b>FF</b>  | <b>PCE</b> |
|-----------------|-------------|----------------------------|-----------------------|------------|------------|
| <b>[Mol. %]</b> |             | <b>[mAcm<sup>-2</sup>]</b> | <b>[V]</b>            | <b>[%]</b> | <b>[%]</b> |
| 0               | Forward     | 19.95                      | 1.079                 | 70         | 15.15      |
|                 | Reverse     | 18.96                      | 1.059                 | 69         | 14.03      |
| 10              | Reverse     | 23.67                      | 1.13                  | 75         | 20.24      |
|                 | Forward     | 23.72                      | 1.13                  | 75         | 20.30      |
| 15              | Forward     | 21.41                      | 1.12                  | 71         | 17.38      |
|                 | Reverse     | 20.60                      | 1.11                  | 70         | 16.11      |

## Section 2

Discussion on derivation of the integrated  $J_{sc}$  from IPCE spectra with  $J_{sc}$  from J-V curve

The integrated  $J_{sc}$  from IPCE is acceptably lower than the  $J_{sc}$  from J-V curve, due to the following reasons:

(1) For the standard measurement of J-V curves, the light intensity is 100 mW/cm<sup>2</sup>. In the IPCE measurement, the light from the monochromator is usually weaker than from the AM1.5 light source (100 mW/cm<sup>2</sup>). The relevant calculated current is obtained from integrated IPCE spectra and the consideration of light from the AM1.5 light source. Due to the fact that relationship of photocurrents and light intensities is not strictly linear, such variation is normal.

(2) The J-V curves are measured in glove box protected by N<sub>2</sub>, while the IPCE spectra are measured in air. Though the stabilities of our devices are improved particularly in N<sub>2</sub>, the sensitivity of the device to H<sub>2</sub>O is not completely eliminated. The water molecule in air causes the slight decay of the photovoltaic performance.
